# Supplementary material
Source: PubMed Central journal article supplement (PMC10947604)
Supplement: NIHMS1954108-supplement-1.pdf [file NIHMS1954108-supplement-1.pdf]

**Supplementary Table 1. MAPS-AR-IT 24 mos raw frequency scores**

|                                                                                                               | Response Category |                            |                             |                                       |                                 |                               |    |        |    |        |    |       |
|---------------------------------------------------------------------------------------------------------------|-------------------|----------------------------|-----------------------------|---------------------------------------|---------------------------------|-------------------------------|----|--------|----|--------|----|-------|
|                                                                                                               | Never (0)         | Rarely (Less than 1x/week) | Some (1-3) days of the week | Most (4-6) days of the week or higher | Every day of the week or higher | Many times each day or higher |    |        |    |        |    |       |
| Freq.                                                                                                         | Percentage        |                            |                             |                                       |                                 |                               |    |        |    |        |    |       |
| <u>In the past month, how often did your child...</u>                                                         |                   |                            |                             |                                       |                                 |                               |    |        |    |        |    |       |
| Jump quickly from one toy or activity to another without really playing with the toys                         | 65                | 28.26%                     | 99                          | 43.04%                                | 46                              | 20.00%                        | 10 | 4.35%  | 7  | 3.04%  | 3  | 1.30% |
| Have trouble paying attention to a simple book or story for 5 minutes or longer                               | 99                | 43.04%                     | 73                          | 31.74%                                | 38                              | 16.52%                        | 11 | 4.78%  | 7  | 3.04%  | 2  | 0.87% |
| Seem easily distracted by things that were happening around him/her                                           | 51                | 22.17%                     | 82                          | 35.65%                                | 64                              | 27.83%                        | 16 | 6.96%  | 11 | 4.78%  | 7  | 3.04% |
| Have trouble sitting still even for a few minutes                                                             | 51                | 22.17%                     | 83                          | 36.09%                                | 65                              | 28.26%                        | 12 | 5.22%  | 12 | 5.22%  | 9  | 3.91% |
| Run or climb so dangerously that you couldn't take your eyes off him/her                                      | 97                | 42.17%                     | 71                          | 30.87%                                | 37                              | 16.09%                        | 11 | 4.78%  | 8  | 3.48%  | 8  | 3.48% |
| Fidget restlessly during feedings or mealtime                                                                 | 96                | 41.74%                     | 66                          | 28.70%                                | 42                              | 18.26%                        | 19 | 8.26%  | 3  | 1.30%  | 5  | 2.17% |
| Demand your attention without being able to wait                                                              | 8                 | 3.48%                      | 57                          | 24.78%                                | 89                              | 38.70%                        | 38 | 16.52% | 23 | 10.00% | 17 | 7.39% |
| <u>In the past month, how often did your child have trouble paying attention, keeping still or waiting...</u> |                   |                            |                             |                                       |                                 |                               |    |        |    |        |    |       |
| When frustrated, angry, or upset                                                                              | 29                | 12.61%                     | 64                          | 27.83%                                | 83                              | 36.09%                        | 37 | 16.09% | 13 | 5.65%  | 2  | 0.87% |
| During daily routines such as mealtime, bedtime, or getting dressed.                                          | 30                | 13.04%                     | 89                          | 38.70%                                | 70                              | 30.43%                        | 27 | 11.74% | 8  | 3.48%  | 4  | 1.74% |
| No matter what is going on around him/her.                                                                    | 90                | 39.13%                     | 86                          | 37.39%                                | 39                              | 16.96%                        | 10 | 4.35%  | 2  | 0.87%  | 1  | 0.43% |
| When excited.                                                                                                 | 35                | 15.22%                     | 85                          | 36.96%                                | 68                              | 29.57%                        | 31 | 13.48% | 6  | 2.61%  | 3  | 1.30% |
| When tired, hungry, or sick.                                                                                  | 25                | 10.87%                     | 59                          | 25.65%                                | 100                             | 43.48%                        | 32 | 13.91% | 9  | 3.91%  | 3  | 1.30% |

Note: Items are presented in the order of administration.

Supplementary Figure 1. Frequency histograms for MAPS-AR-IT items at 12 mos.

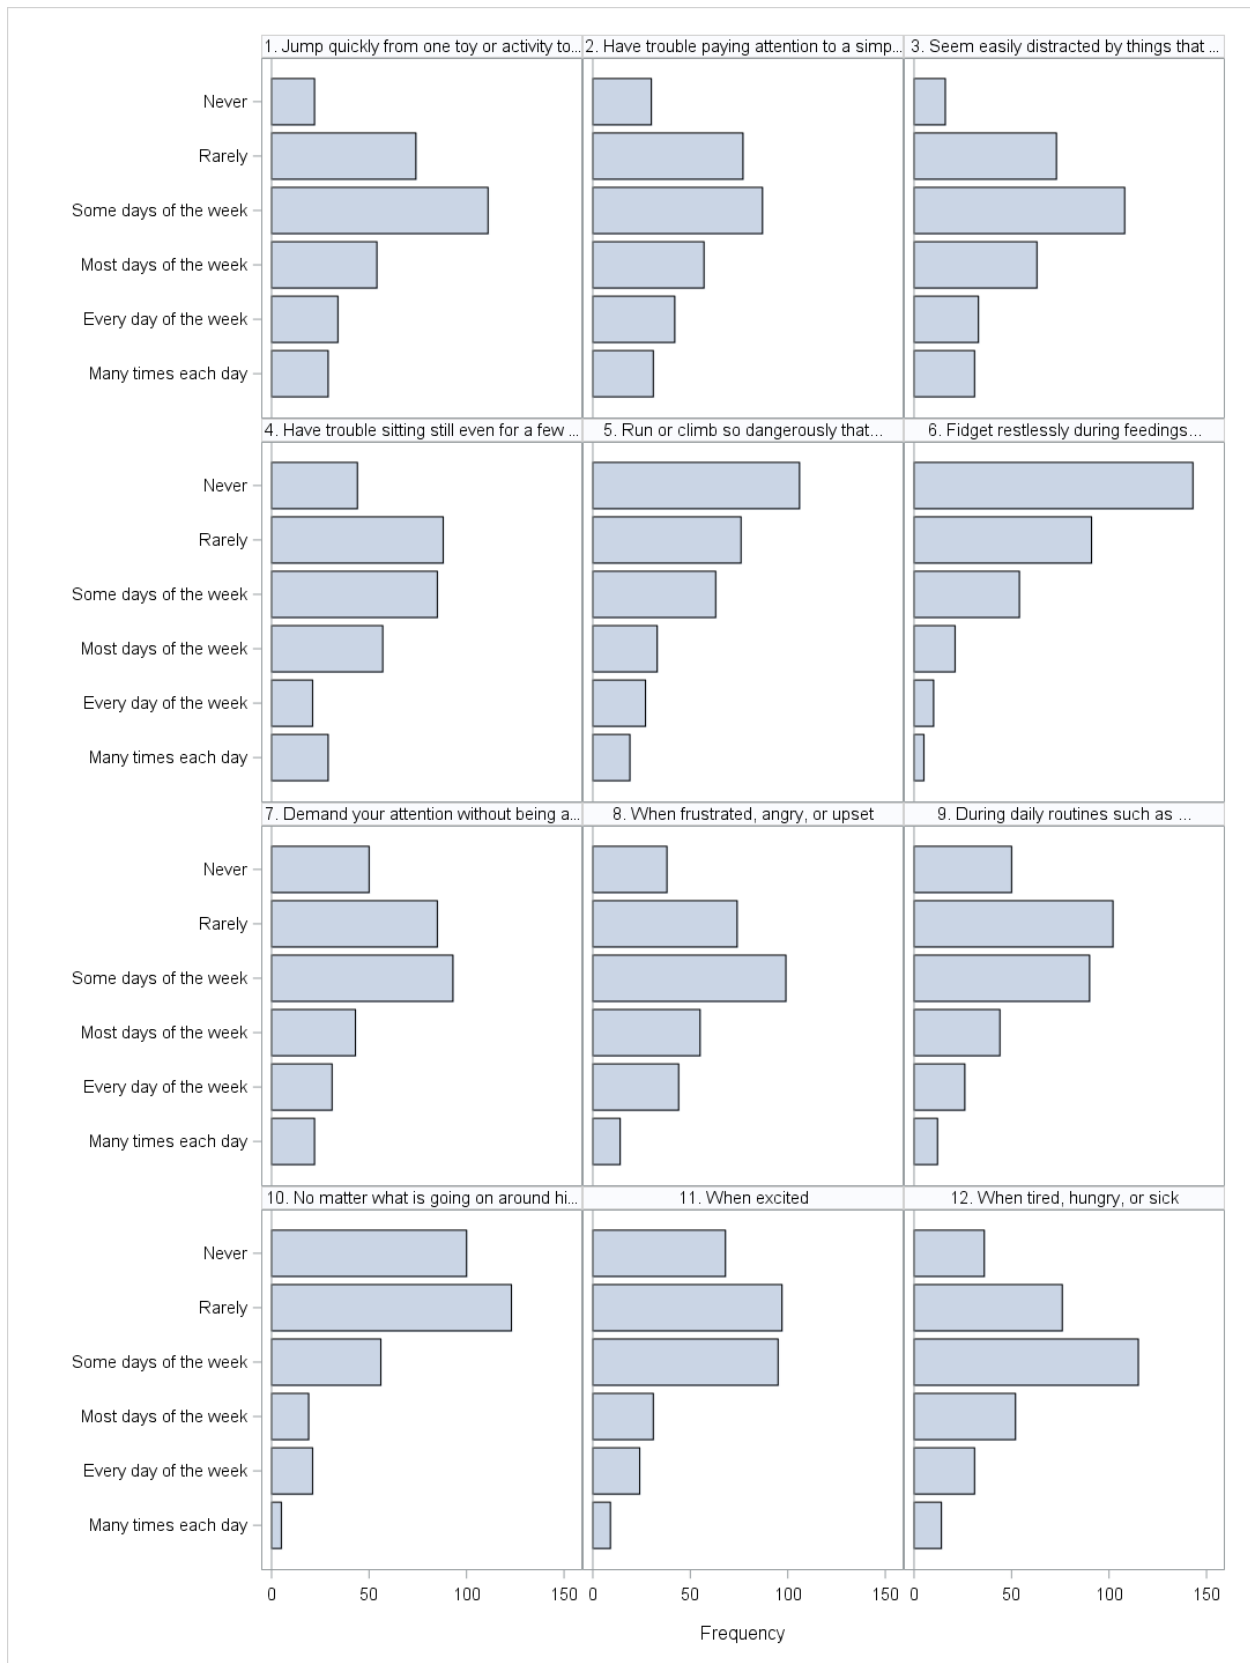

Supplementary Table 2. MAPS-AR-IT 24 mos theta scores with severity threshold

| Item Location                                                                                                 | Category Thresholds                  |                                       |                                       |                                 |                               |             |
|---------------------------------------------------------------------------------------------------------------|--------------------------------------|---------------------------------------|---------------------------------------|---------------------------------|-------------------------------|-------------|
|                                                                                                               | Rarely (Less than 1x/week) or higher | Some (1-3) days of the week or higher | Most (4-6) days of the week or higher | Every day of the week or higher | Many times each day or higher |             |
| mean (b)                                                                                                      | b1                                   | b2                                    | b3                                    | b4                              | b5                            |             |
| <b>Attention Regulation (95th perc. Threshold = 1.484)</b>                                                    |                                      |                                       |                                       |                                 |                               |             |
| In the past month, how often did your child...<br>Fidget restlessly during feedings or mealtime               | <b>1.79</b>                          | -0.34                                 | 0.82                                  | <b>1.92</b>                     | <b>3.09</b>                   | <b>3.49</b> |
| Run or climb so dangerously that you couldn't take your eyes off him/her                                      | <b>1.77</b>                          | -0.33                                 | 1.01                                  | <b>2.07</b>                     | <b>2.65</b>                   | <b>3.44</b> |
| Have trouble paying attention to a simple book or story for 5 minutes or longer                               | <b>1.65</b>                          | -0.23                                 | 0.88                                  | <b>1.83</b>                     | <b>2.40</b>                   | <b>3.35</b> |
| Jump quickly from one toy or activity to another without really playing with the toys                         | 1.40                                 | -0.75                                 | 0.72                                  | <b>1.78</b>                     | <b>2.25</b>                   | <b>2.98</b> |
| Have trouble sitting still even for a few minutes                                                             | 0.96                                 | -1.05                                 | 0.27                                  | 1.39                            | <b>1.76</b>                   | <b>2.41</b> |
| Seem easily distracted by things that were happening around him/her                                           | 0.95                                 | -0.94                                 | 0.23                                  | 1.27                            | <b>1.77</b>                   | <b>2.40</b> |
| Demand your attention without being able to wait                                                              | 0.12                                 | -2.87                                 | -0.82                                 | 0.66                            | 1.42                          | <b>2.19</b> |
| <u>In the past month, how often did your child have trouble paying attention, keeping still or waiting...</u> |                                      |                                       |                                       |                                 |                               |             |
| No matter what is going on around him/her                                                                     | <b>1.67</b>                          | -0.30                                 | 0.82                                  | <b>1.80</b>                     | <b>2.72</b>                   | <b>3.30</b> |
| When excited                                                                                                  | 0.93                                 | -1.26                                 | 0.08                                  | 1.06                            | <b>2.05</b>                   | <b>2.71</b> |
| During daily routines such as mealtime, bedtime, or getting dressed                                           | 0.88                                 | -1.42                                 | 0.09                                  | 1.14                            | <b>1.97</b>                   | <b>2.60</b> |
| When tired, hungry, or sick                                                                                   | 0.77                                 | -1.55                                 | -0.37                                 | 1.00                            | <b>1.95</b>                   | <b>2.80</b> |
| When frustrated, angry, or upset                                                                              | 0.72                                 | -1.34                                 | -0.21                                 | 0.82                            | <b>1.61</b>                   | <b>2.71</b> |

Note: Items ordered by severity score with each item stem. Mean(b) is the average of the five theta/item threshold values. Theta values greater than 1.484 were bolded, indicating atypicality.
